# Supplementary material
Source: PubMed Central journal article supplement (PMC3021096)
Supplement: NIHMS260175-supplement-1_si_001.pdf [file NIHMS260175-supplement-1_si_001.pdf]

## Supporting Information

### **The Role of Cationic Group Structure in Membrane Binding and Disruption by Amphiphilic Copolymers**

Edmund F. Palermo<sup>†</sup>, Dong-Kuk Lee<sup>‡,§</sup>, Ayyalusamy Ramamoorthy<sup>‡</sup>, and Kenichi Kuroda<sup>†,¥,\*</sup>

<sup>†</sup> *Macromolecular Science and Engineering Center*, <sup>‡</sup> *Department of Chemistry and Biophysics*, and <sup>¥</sup> *Department of Biological and Materials Sciences, School of Dentistry, University of Michigan, Ann Arbor, Michigan 48109*, <sup>§</sup> *Department of Fine Chemistry, Seoul National University of Technology, Seoul, Korea 139-743*.

\* Corresponding author:

E-mail: [kkuroda@umich.edu](mailto:kkuroda@umich.edu)

Telephone: 1-734-936-1440

Fax: 1-734-647-2110

#### **Contents**

|           |                                                                                                                                           |   |
|-----------|-------------------------------------------------------------------------------------------------------------------------------------------|---|
| <b>S1</b> | Synthesis of dansyl-conjugated chain transfer agent                                                                                       | 2 |
| <b>S2</b> | Functionalized copolymer synthesis                                                                                                        | 2 |
| <b>S3</b> | <sup>1</sup> H NMR spectra of the copolymers and the dansyl chain transfer agent                                                          | 3 |
| <b>S4</b> | Emission spectra of the dansyl-labeled polymers in aqueous buffer                                                                         | 4 |
| <b>S5</b> | Emission intensity versus polymer concentration in methanol (calibration curves for determining the water-octanol partition coefficients) | 4 |
| <b>S6</b> | Hemolysis raw data and curve-fitting to the Hill equation                                                                                 | 4 |
| <b>S7</b> | Binding of the copolymers to POPC vesicles in buffers of pH 6, 6.5, 7, 7.5, and 8                                                         | 5 |

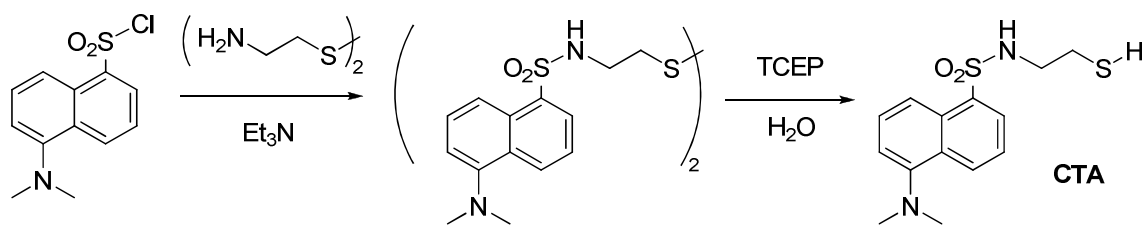

**Figure S1.** Synthesis of the dansyl-labeled chain transfer agent (CTA).

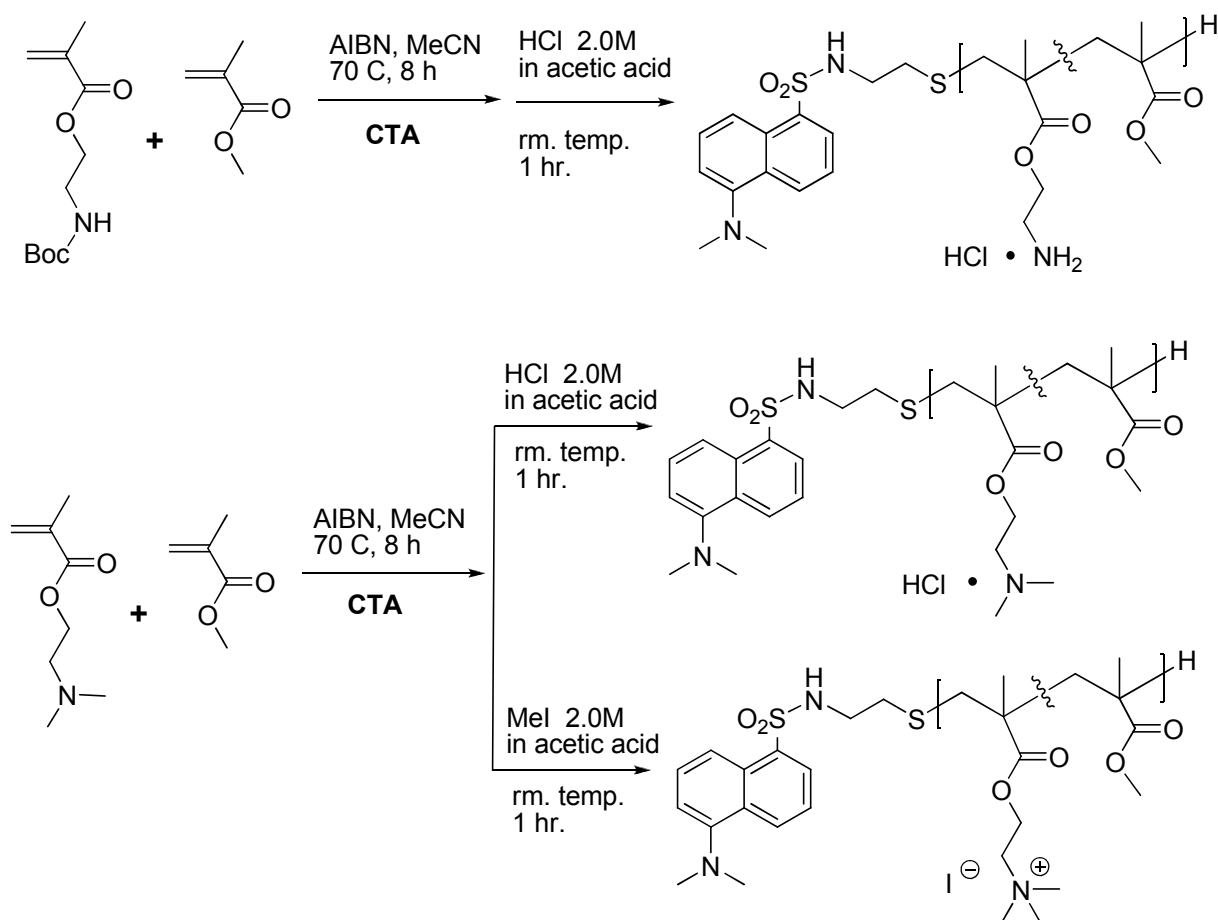

**Figure S2.** Synthesis of the amphiphilic random copolymers with dansyl end groups and different ammonium groups in the side chains

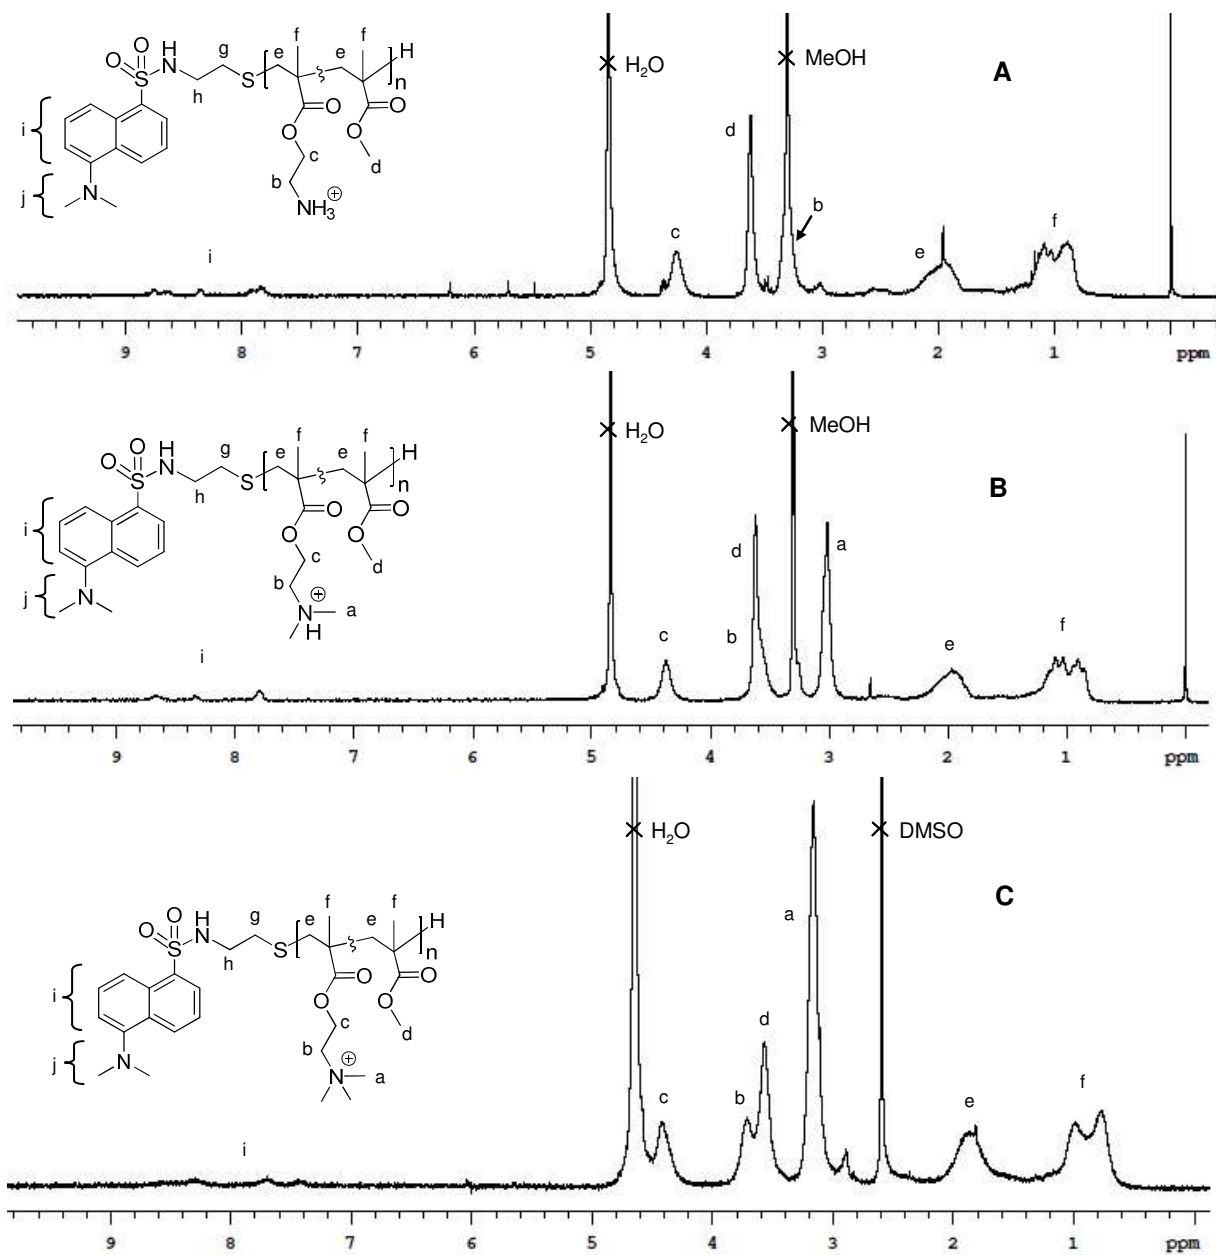

**Figure S3.**  $^1\text{H}$  NMR spectra of (A) **1** in  $\text{MeOH-d}_4$ , (B) **2** in  $\text{MeOH-d}_4$ , and (C) **3** in  $\text{D}_2\text{O}$ .

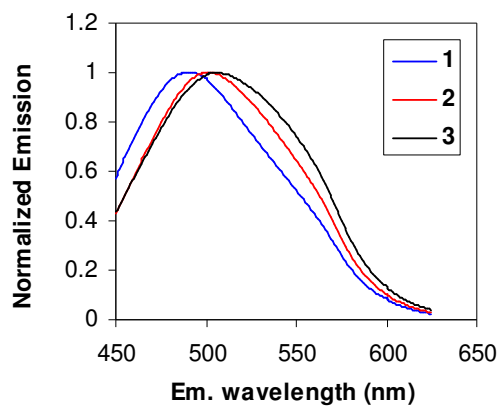

**Figure S4.** Normalized emission of the dansyl-labeled polymers in MES-buffered saline, pH 6.

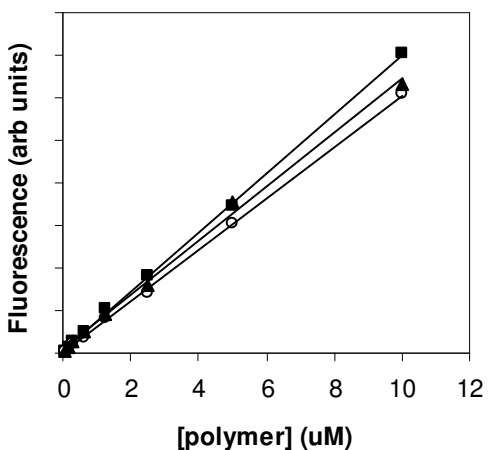

**Figure S5.** Fluorescence intensity versus concentration of the polymers in methanol, used as the calibration curves for the calculation of partition coefficients.

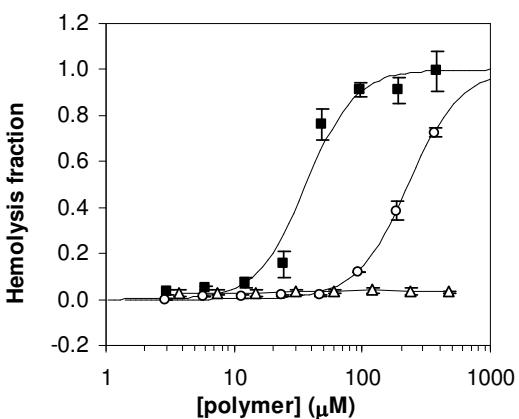

**Figure S6.** Hemolysis curves for each the copolymers with primary (filled square), tertiary (empty circle), and quaternary (empty triangle) ammonium groups.

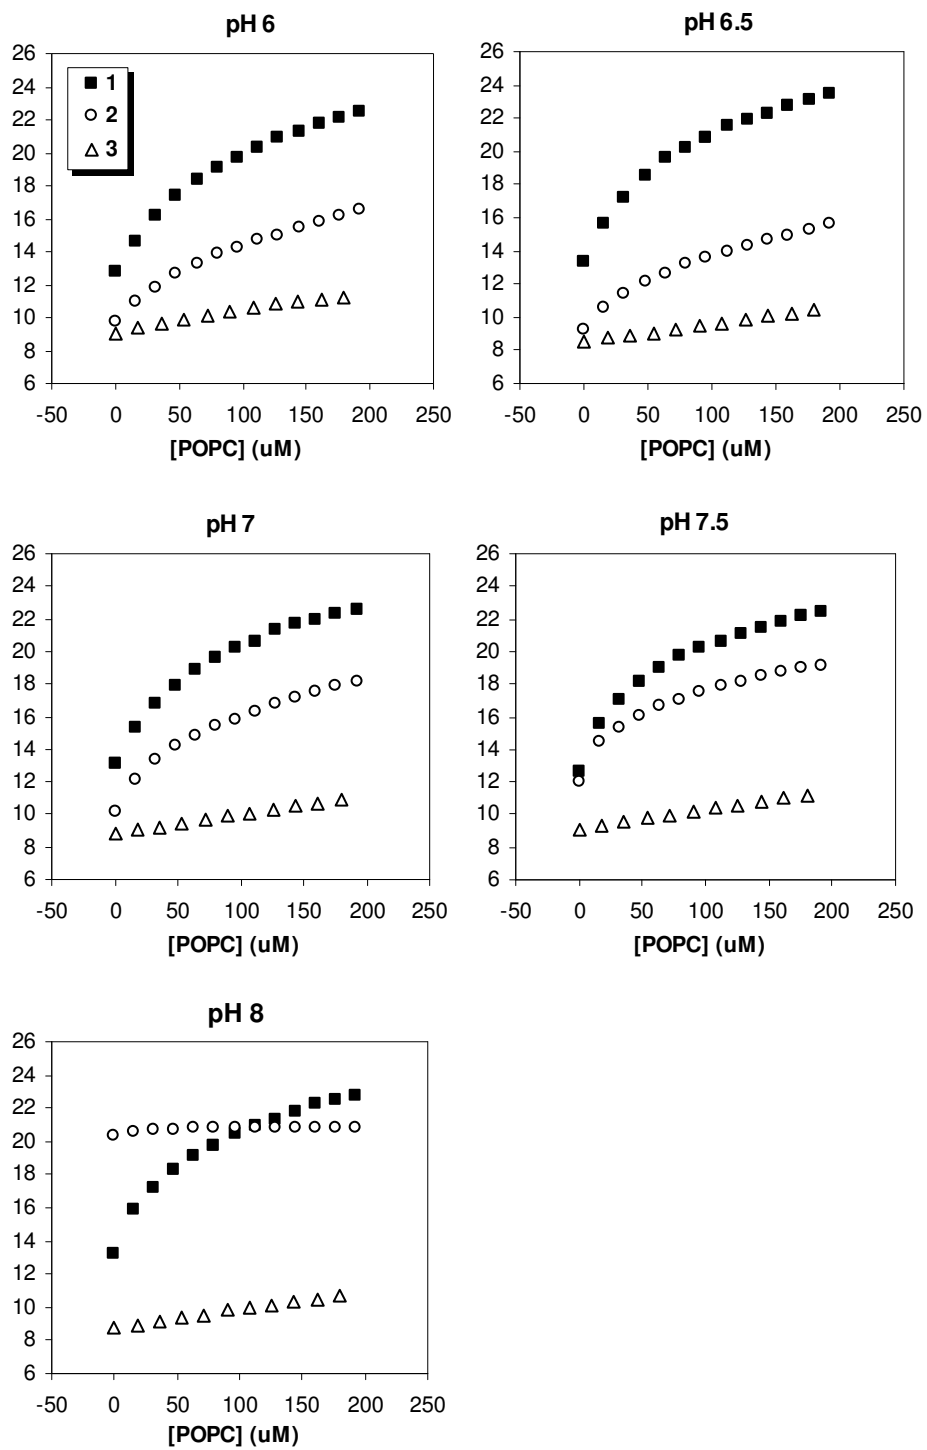

**Figure S7.** Binding curves for each of the polymers in pH ranging from 6 to 8.
